# Supplementary material for: Aluminium based binary catalytic system for the solvent free conversion of CO2 to carbonates with high activity and selectivity
Source: Royal Society of Chemistry journal article supplement (doi:10.1039/c8ra00835c), 2018-01-01

## Supporting Information

### **Aluminium based binary catalytic system for the solvent free conversion CO<sub>2</sub> to carbonates with high activity and selectivity**

Ran Ma,\* Haojie Sun, and Yuanzhi Cui

*College of Chemistry and Chemical Engineering, Shaanxi University of Science and Technology, 6*

*Xuefu Road, Weiyang District, Xi'an, Shaanxi 710021, China*

*E-mail: maran@sust.edu.cn*

## Characterization data and NMR Spectra Copies

**Propylene carbonate:**  $^1\text{H}$  NMR (400 MHz,  $\text{CDCl}_3$ )  $\delta$  5.03-4.79 (m, 1H), 4.59 (dt,  $J = 7.9, 5.3$  Hz, 1H), 4.17-3.91 (m, 1H), 1.49 (d,  $J = 6.2$  Hz, 3H);  $^{13}\text{C}$  NMR (100.6 MHz,  $\text{CDCl}_3$ )  $\delta$  155.16 (s), 73.71 (s), 70.72 (s), 19.28 (s).

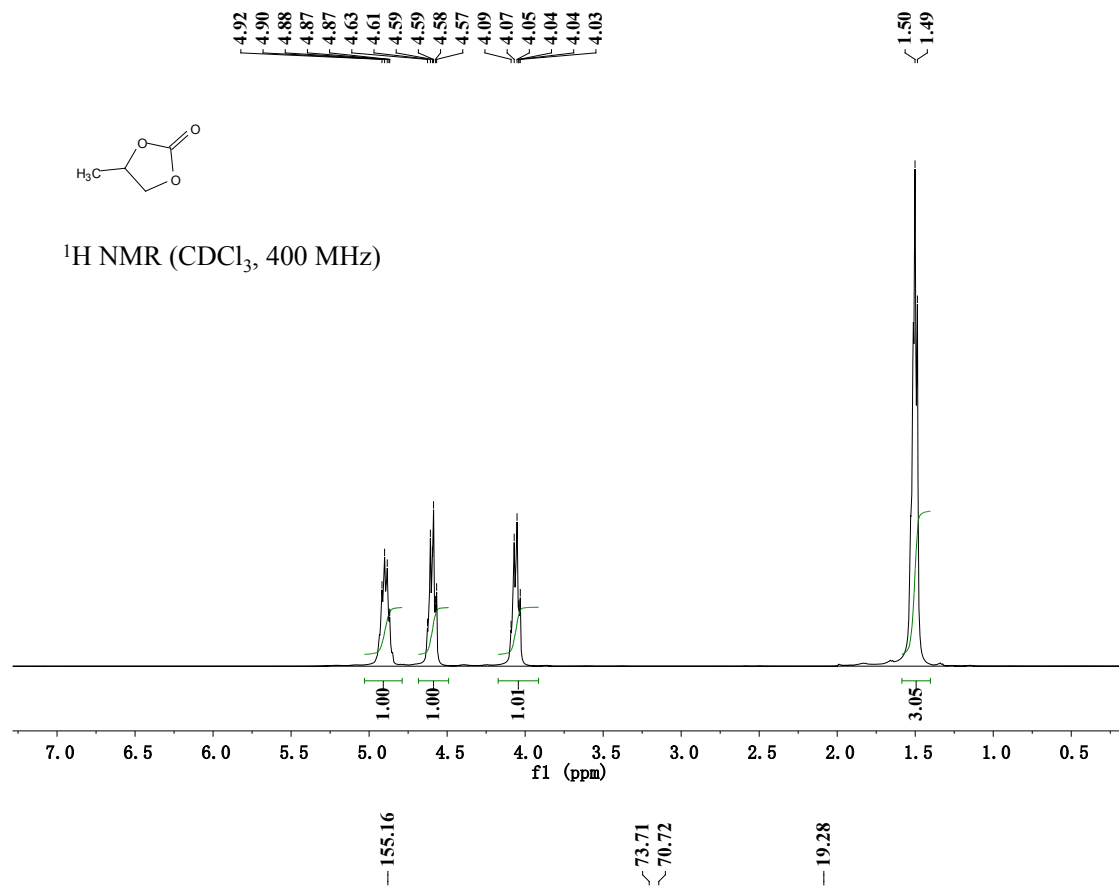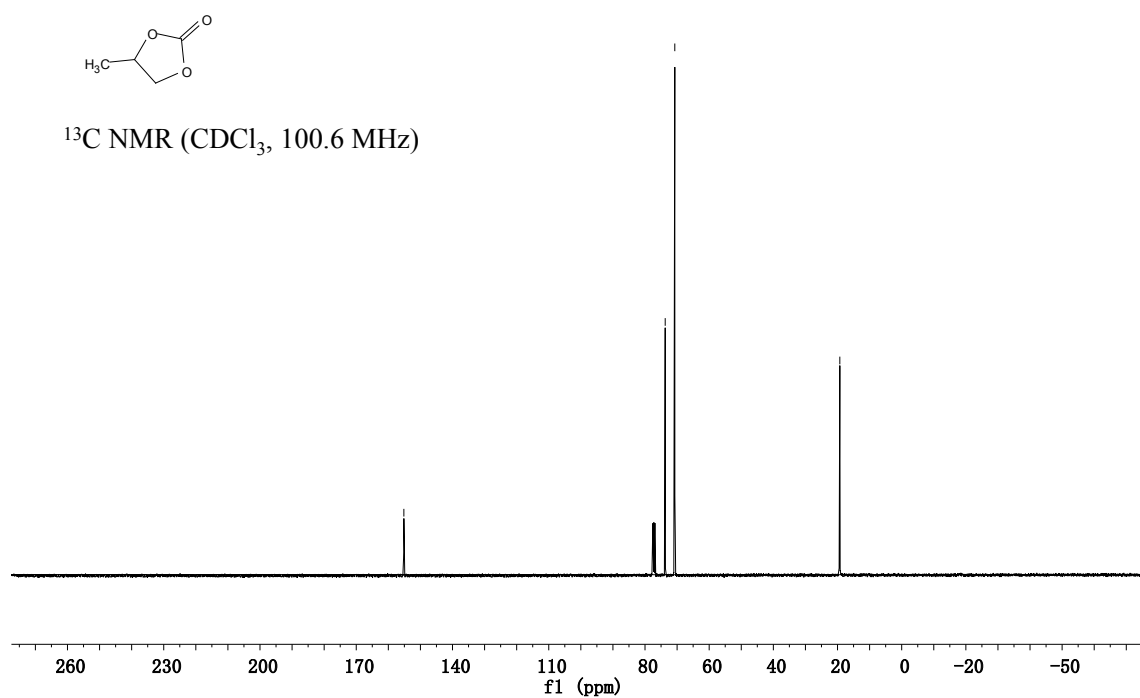

**Styrene carbonate:**  $^1\text{H}$  NMR (400 MHz,  $\text{CDCl}_3$ )  $\delta$  7.49-7.30 (m, 5H), 5.68 (t,  $J = 8.0$  Hz, 1H), 4.80 (t,  $J = 8.4$  Hz, 1H), 4.33 (t,  $J = 8.2$  Hz, 1H);  $^{13}\text{C}$  NMR (100.6 MHz,  $\text{CDCl}_3$ )  $\delta$  155.02 (s), 135.87 (s), 129.74 (s), 129.24 (s), 125.99 (s), 78.09 (s), 77.55 (s), 77.23 (s), 76.91 (s), 71.25 (s).

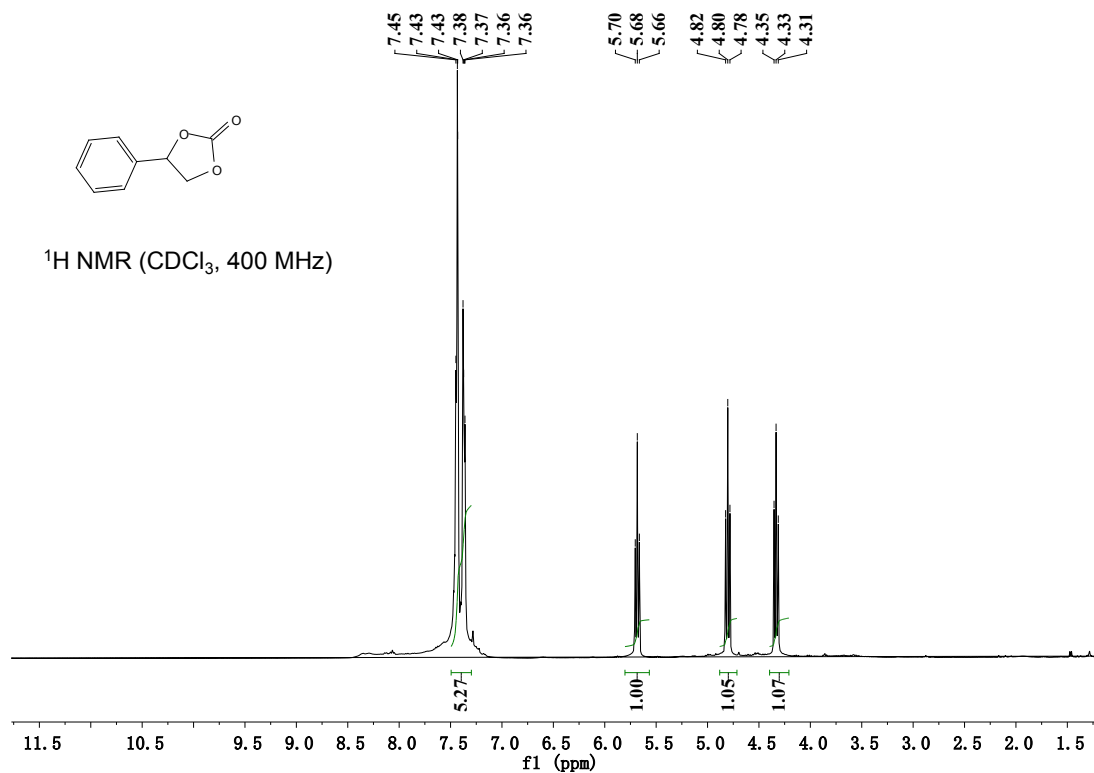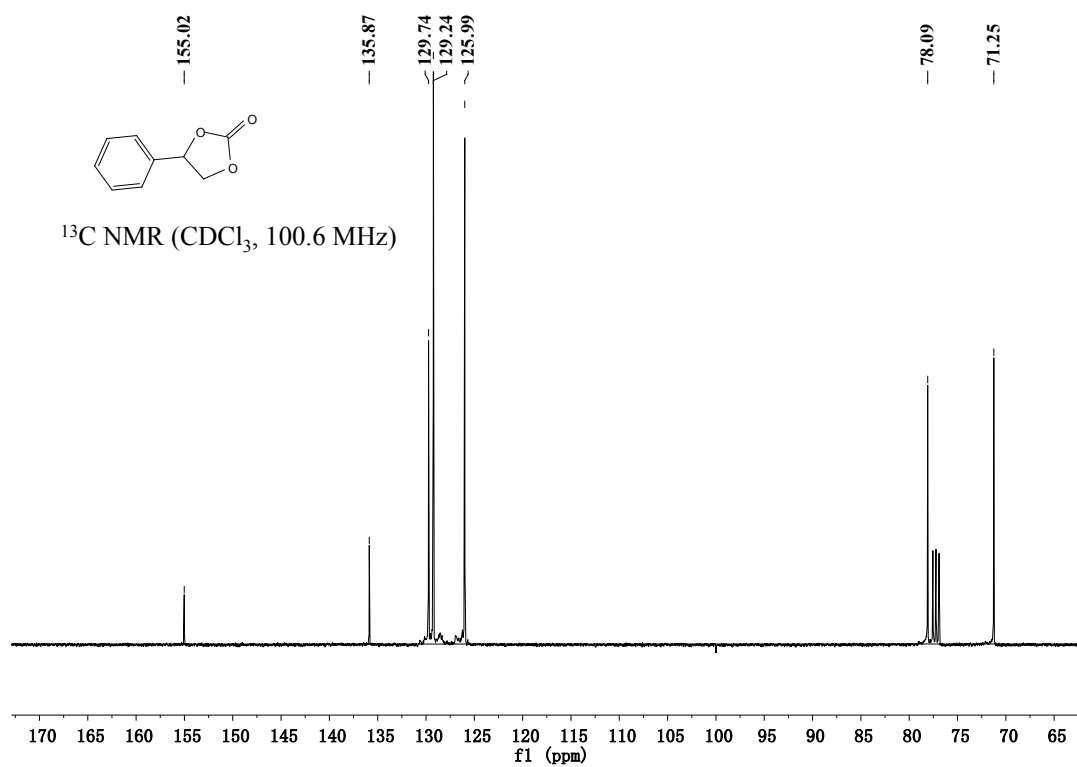

**4-Phenoxymethyl-1,3-dioxolan-2-one:**  $^1\text{H}$  NMR (400 MHz,  $\text{CDCl}_3$ )  $\delta$  7.31 (t, 2H), 7.02 (t,  $J = 7.4$  Hz, 1H), 6.91 (d,  $J = 7.9$  Hz, 2H), 5.09–4.95 (m, 1H), 4.62 (t,  $J = 8.4$  Hz, 1H), 4.54 (dd,  $J = 8.5$ , 5.9 Hz, 1H), 4.24 (dd,  $J = 10.5$ , 4.4 Hz, 1H), 4.16 (dd,  $J = 10.5$ , 3.6 Hz, 1H);  $^{13}\text{C}$  NMR (100.6 MHz,  $\text{CDCl}_3$ )  $\delta$  129.72 (s), 122.03 (s), 114.62 (s), 74.05 (s), 66.88 (s), 66.26 (s).

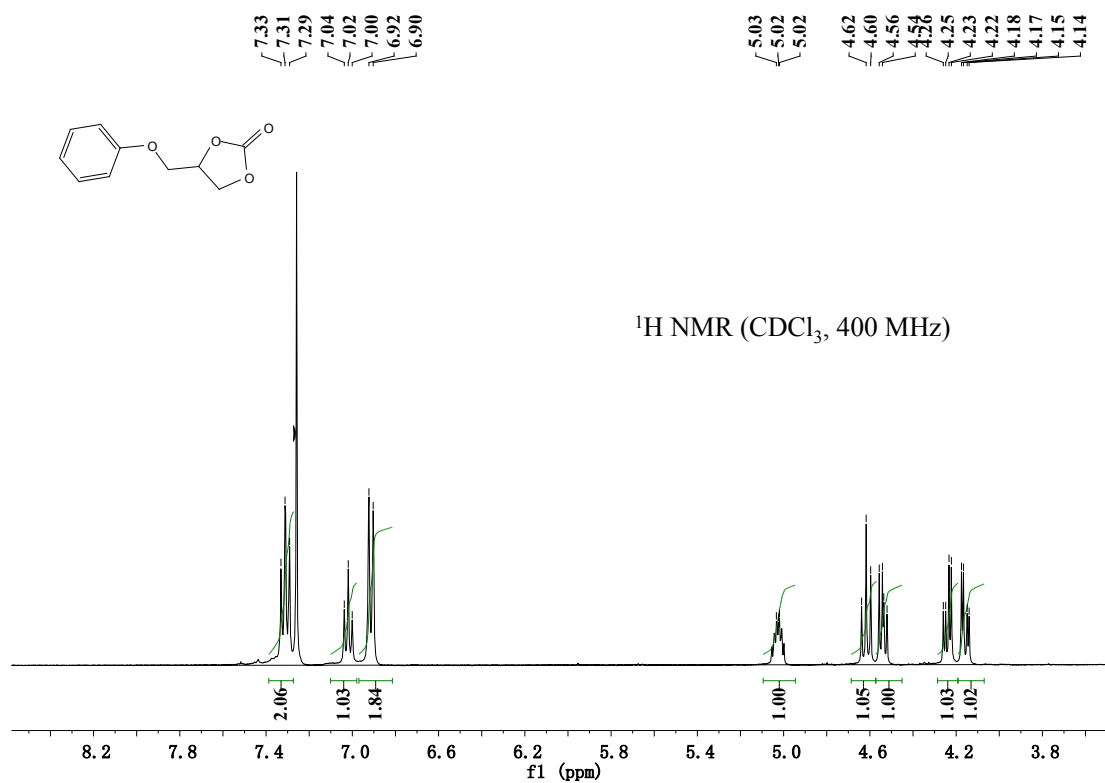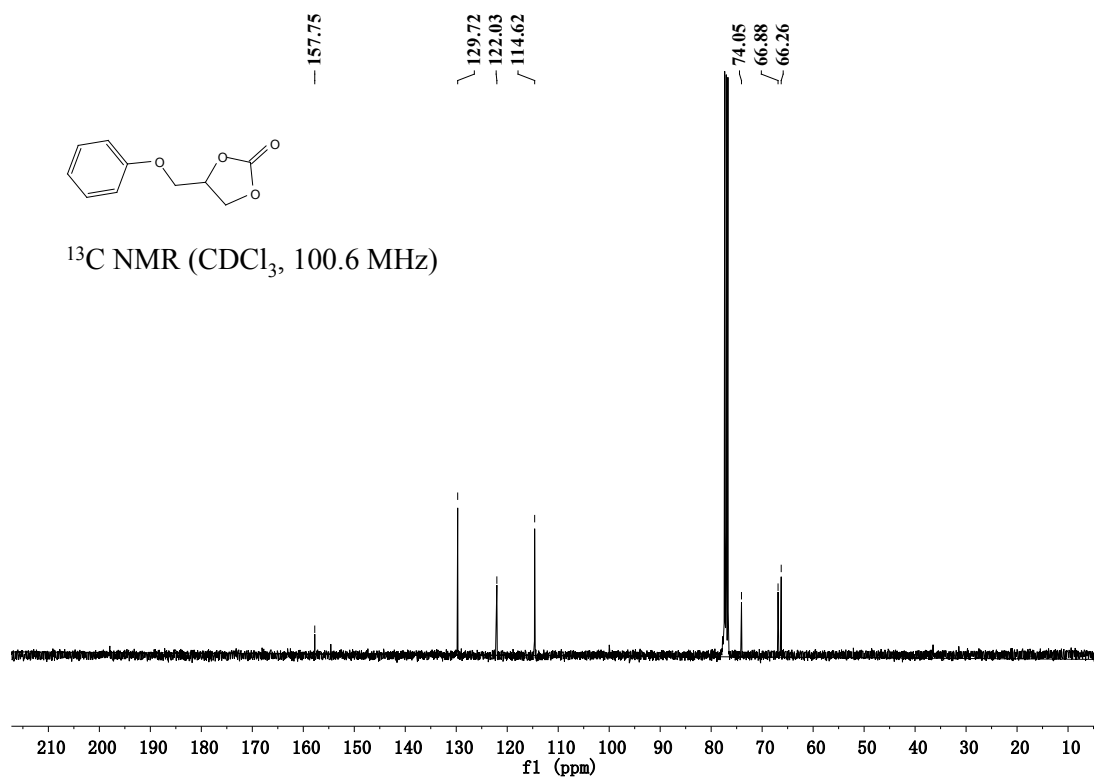

**4-*i*-Propoxy-1,3-dioxolan-2-one:**  $^1\text{H}$  NMR (400 MHz,  $\text{CDCl}_3$ )  $\delta$  4.84 – 4.79 (m, 1H), 4.50 (t,  $J = 8.3$  Hz, 1H), 4.33 (dd,  $J = 8.3, 6.0$  Hz, 1H), 3.70 – 3.58 (m, 3H), 1.16 (d,  $J = 6.1$  Hz, 7H).  $^{13}\text{C}$  NMR (101 MHz,  $\text{CDCl}_3$ )  $\delta$  155.18, 75.31, 72.86, 67.10, 66.40, 21.87, 21.75.

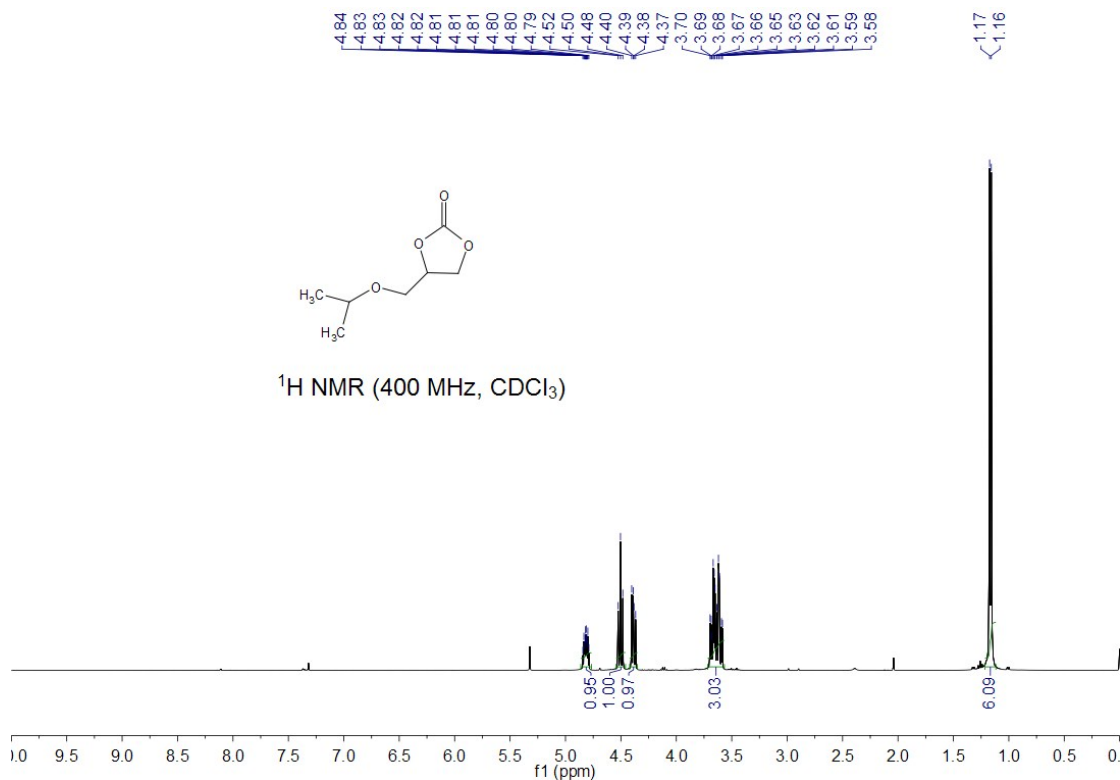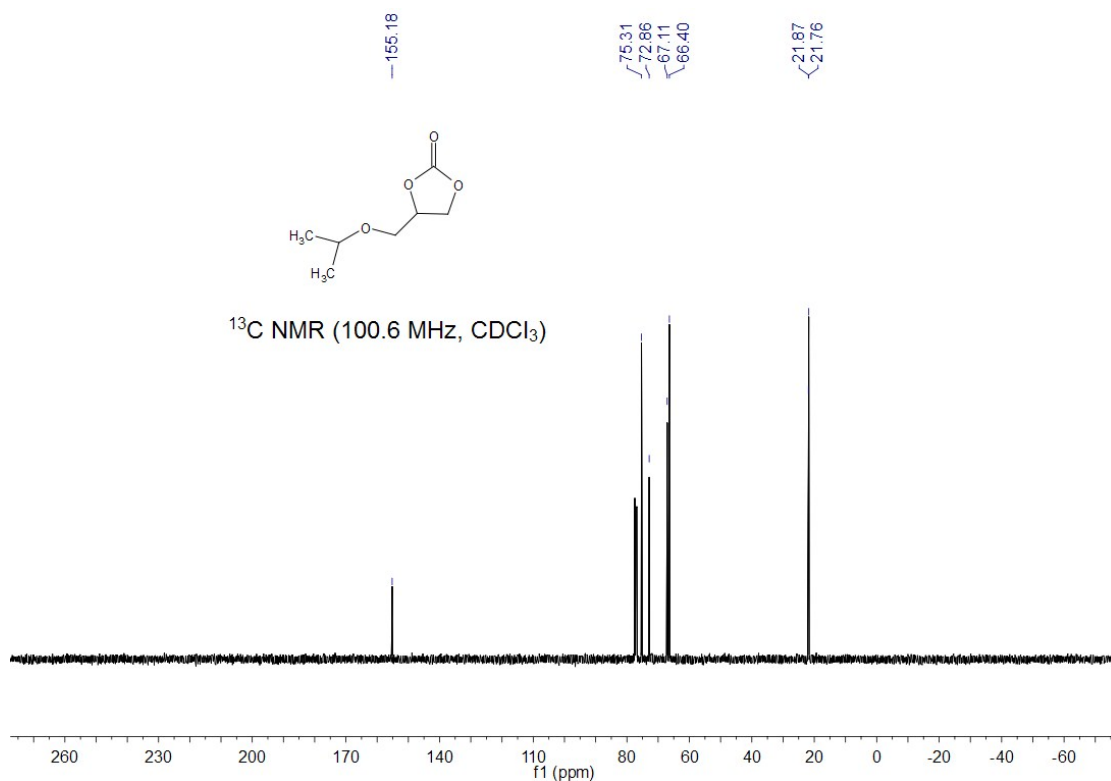

**4,4-dimethyl-1,3-dioxolan-2-one:**  $^1\text{H}$  NMR (400 MHz,  $\text{CDCl}_3$ )  $\delta$  4.17 (s, 2 H), 1.53 (s, 6 H);  $^{13}\text{C}$  NMR (100.6 MHz,  $\text{CDCl}_3$ )  $\delta$  154.65, 81.79, 75.39, 25.98.

**hexahydrobenzo[d][1,3]dioxol-2-one:**  $^1\text{H}$  NMR (400 MHz,  $\text{CDCl}_3$ )  $\delta$  4.70 (s, 2H), 1.91 (d,  $J = 5.4$  Hz, 4H), 1.69-1.52 (m, 2H), 1.51-1.34 (m, 2H);  $^{13}\text{C}$  NMR (100.6 MHz,  $\text{CDCl}_3$ )  $\delta$  155.37 (s), 75.76 (s), 26.77 (s), 19.16 (s).

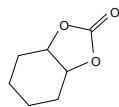

$^1\text{H}$  NMR ( $\text{CDCl}_3$ , 400 MHz)

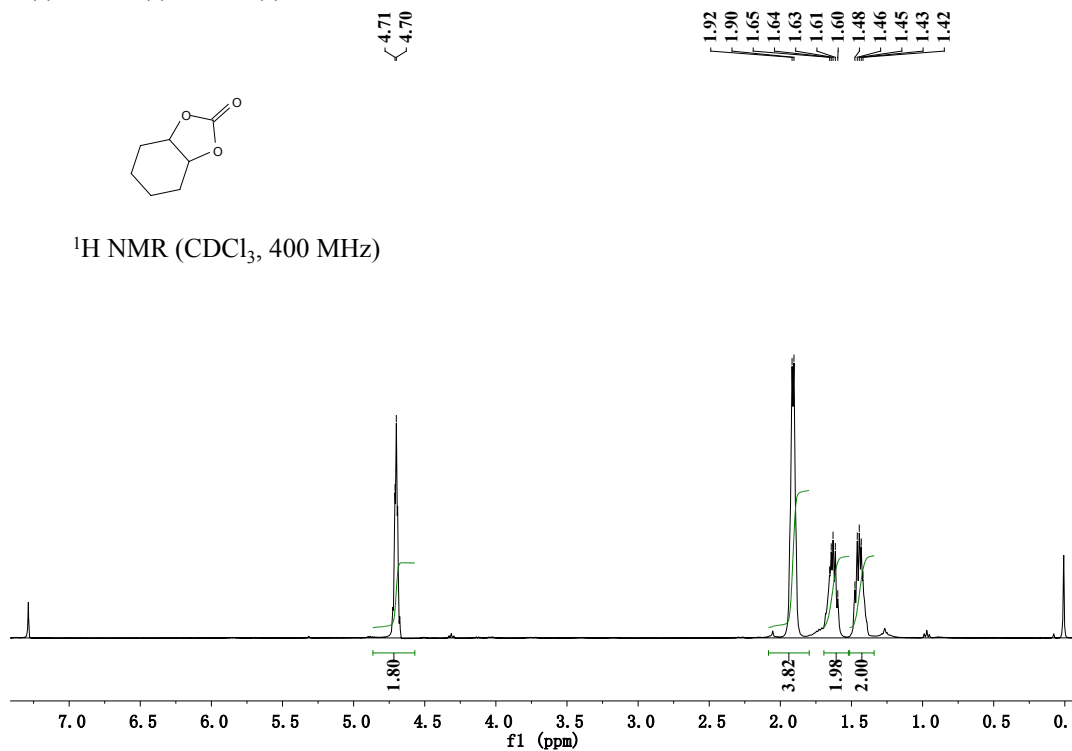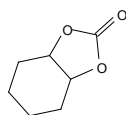

$^{13}\text{C}$  NMR ( $\text{CDCl}_3$ , 100.6 MHz)

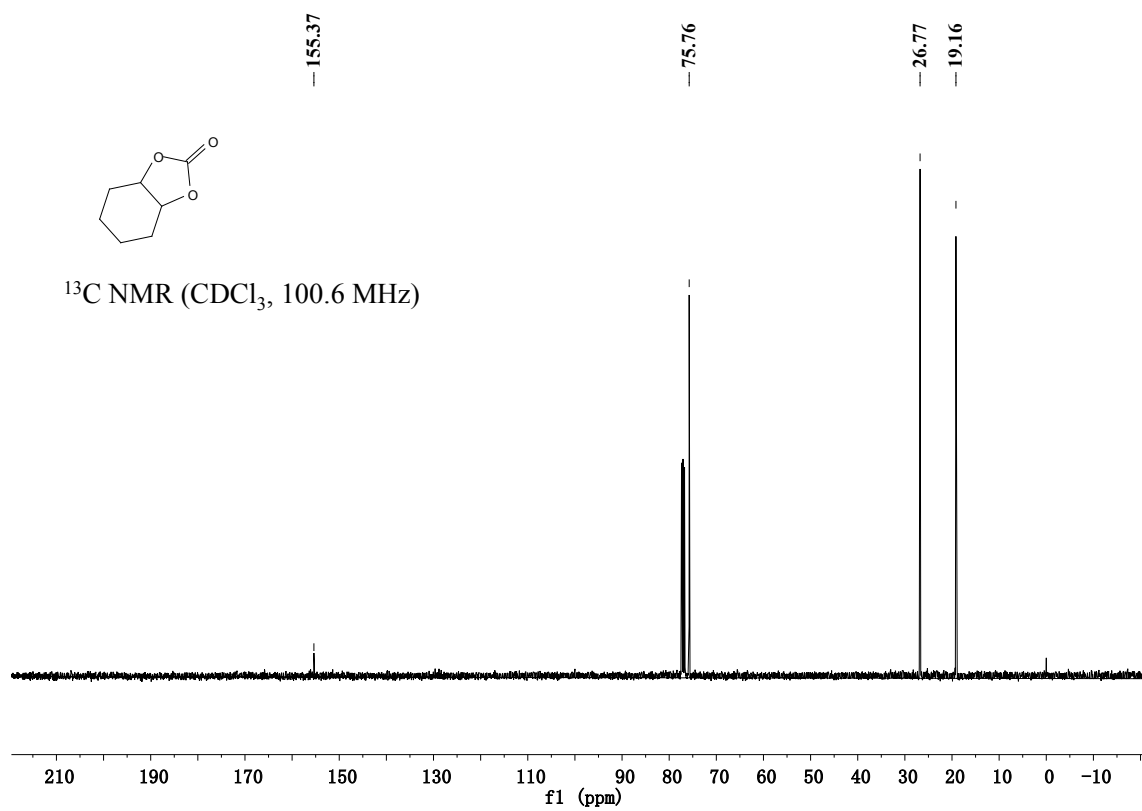

**4-(chloromethyl)-1,3-dioxolan-2-one** :  $^1\text{H}$  NMR (400 MHz,  $\text{CDCl}_3$ )  $\delta$  5.09 – 4.92 (m, 1H), 4.68 – 4.55 (m, 1H), 4.42 (dd,  $J = 11.4, 3.2$  Hz, 1H), 3.82 (dd,  $J = 5.0, 0.6$  Hz, 2H).  $^{13}\text{C}$  NMR (101 MHz,  $\text{CDCl}_3$ )  $\delta$  154.43, 74.43, 66.99, 43.98.

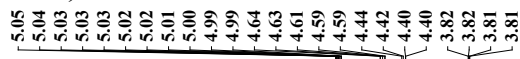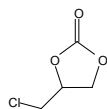

$^1\text{H}$  NMR ( $\text{CDCl}_3$ , 400 MHz)

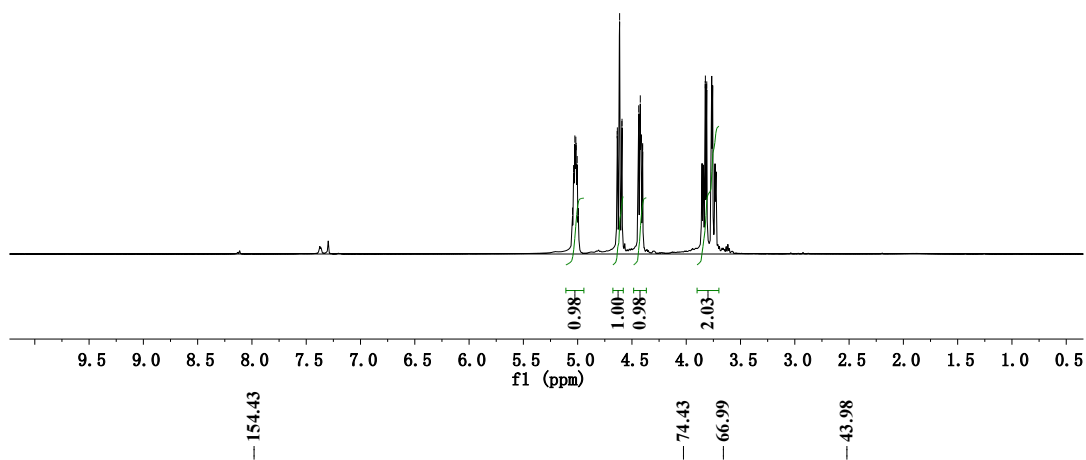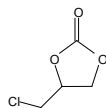

$^{13}\text{C}$  NMR ( $\text{CDCl}_3$ , 100.6 MHz)

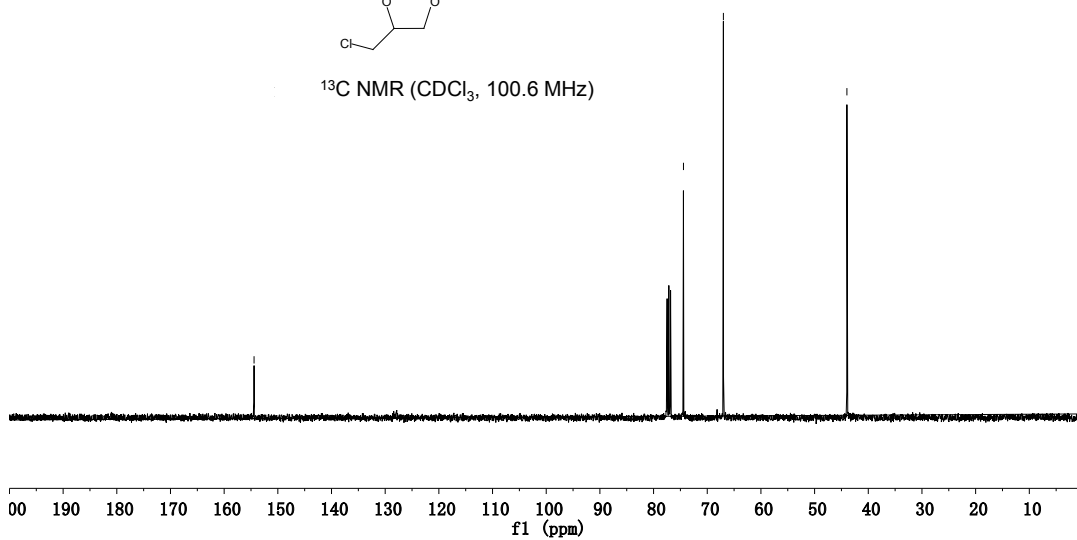

Supplement: c8ra00835c1.pdf [file c8ra00835c1.pdf]
